# Supplementary material
Source: Elsevier journal article supplement (https://www.sciencedirect.com/science/article/pii/S2530016422002567)
Supplement: mmc1 [file S2530016422002567:mmc1.doc]

Supplementary material.

Previous 640G without CGM user:

Previous SAP-PLGS system user:
